# Supplementary material for: Tendon and Cytokine Marker Expression by Human Bone Marrow Mesenchymal Stem Cells in a Hyaluronate/Poly-Lactic-Co-Glycolic Acid (PLGA)/Fibrin Three-Dimensional (3D) Scaffold
Source: PubMed Central journal article supplement (PMC7291129; doi:10.3390/cells9051268), 2020-05-20
Supplement: cells-09-01268-s001.pdf [file cells-09-01268-s001.pdf]

Supplementary Data

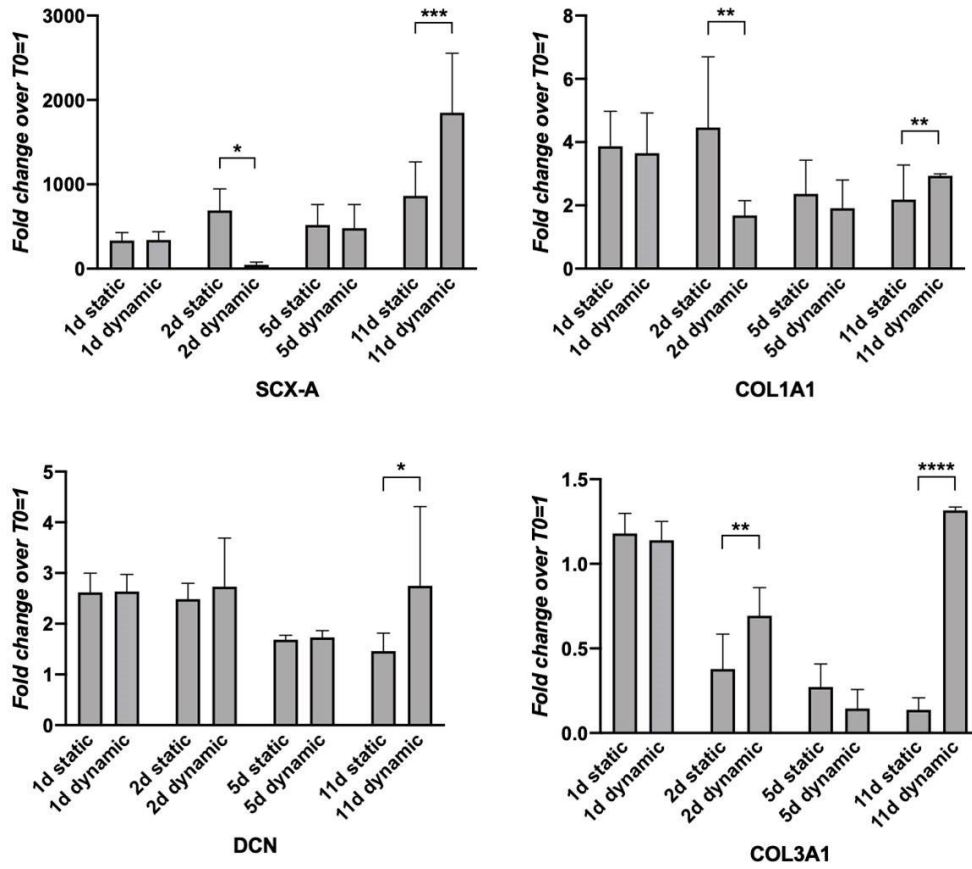

Figure S1. Gene expression profiles of positive (SCX-A, COL1A1, DCN) and negative (COL3A1) tenogenic markers of HY-FIB static vs. dynamic culture. \* < 0.05; \*\* < 0.01; \*\*\* < 0.005; \*\*\*\* < 0.001.

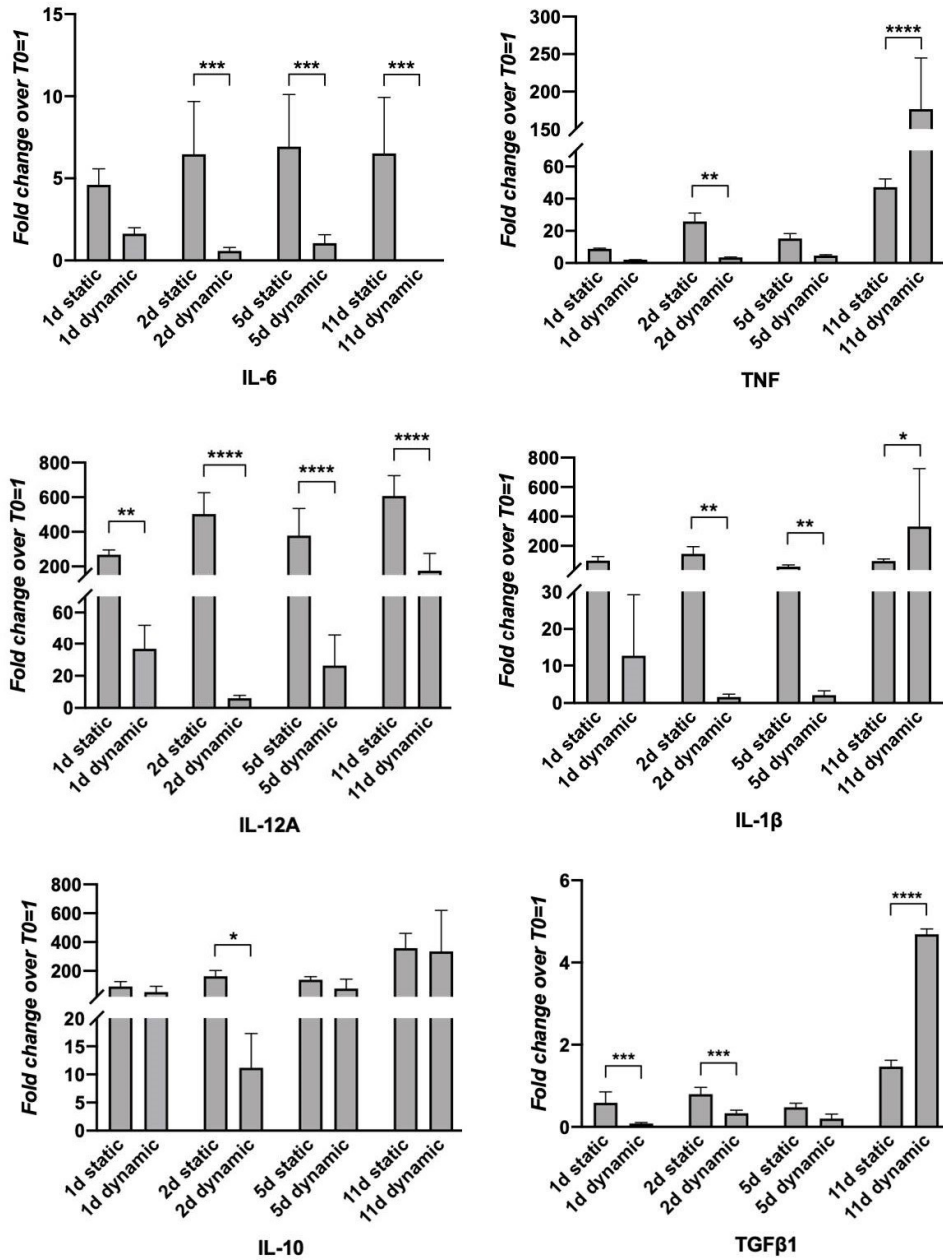

**Figure S2.** Gene expression profiles of pro-inflammatory (IL-6, TNF, IL-12A, IL-1β) and anti-inflammatory (IL-10, TGFβ1) cytokine markers of HY-FIB static vs. dynamic culture. \* < 0.05; \*\* < 0.01; \*\*\* < 0.005; \*\*\*\* < 0.001.
